# Supplementary material for: Synthesis and characterization of biobased thermoplastic polyester elastomers containing Poly(butylene 2,5-furandicarboxylate)
Source: Royal Society of Chemistry journal article supplement (doi:10.1039/d1ra00066g), 2021-01-01
Supplement: d1ra00066g1.pdf [file d1ra00066g1.pdf]

## Supporting information

### **Synthesis and Characterization of Biobased Thermoplastic Polyester Elastomers Containing Poly(butylene 2,5- furandicarboxylate)**

*Hailan Kang, <sup>\*,a,b</sup> Xiaoli Miao,<sup>a,b</sup> Jiahuan Li,<sup>a,b</sup> Donghan Li,<sup>a,b</sup> Qinghong Fang<sup>\*,a,b</sup>*

<sup>a</sup> College of Materials Science and Engineering, Shenyang University of Chemical Technology,

Shenyang, 110142, China

<sup>b</sup> Key Laboratory for Rubber Elastomer of Liaoning Province, Shenyang University of Chemical

Technology, Shenyang, 110142, China

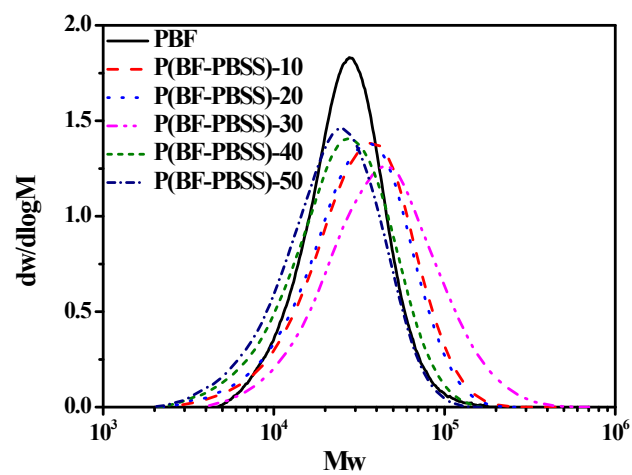

**Fig. S1.** The GPC curve of PBF and P(BF-PBSS)s.

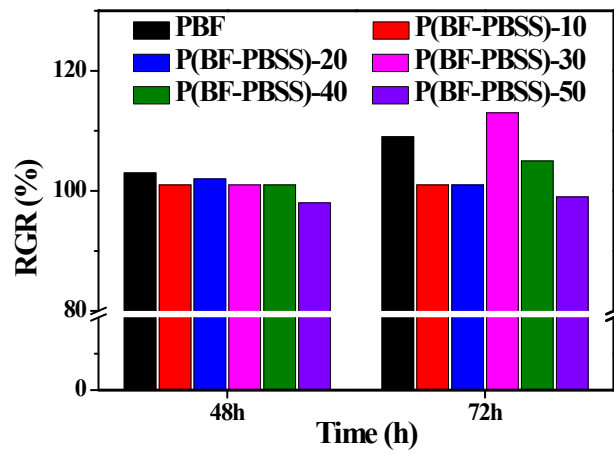

**Fig.S2.** RGR values of PBF and P(BF-PBSS)s at different incubation time.

**Table S1.** Thermal properties of PBF and P(BF-PBSS)s.

| Samples       | DSC           |                                      |                |                 |                  |                                         |               |                                      | TGA                 |                     | $X_c$<br>(%) |
|---------------|---------------|--------------------------------------|----------------|-----------------|------------------|-----------------------------------------|---------------|--------------------------------------|---------------------|---------------------|--------------|
|               | Cooling       |                                      | Second heating |                 |                  |                                         |               |                                      | $T_{d,5\%}$<br>(°C) | $T_{d,max}$<br>(°C) |              |
|               | $T_c$<br>(°C) | $\Delta H_c$<br>(J·g <sup>-1</sup> ) | $T_g$<br>(°C)  | $T_g^a$<br>(°C) | $T_{cc}$<br>(°C) | $\Delta H_{cc}$<br>(J·g <sup>-1</sup> ) | $T_m$<br>(°C) | $\Delta H_m$<br>(J·g <sup>-1</sup> ) |                     |                     |              |
| PBF           | 112           | 32.5                                 | 48             | 51              | /                | /                                       | 171           | 40.5                                 | 385                 | 413                 | 29.4         |
| P(BF-PBSS)-10 | 98            | 27.0                                 | 30             | 32              | 87               | 0.9                                     | 160           | 32.8                                 | 386                 | 419                 | 22.9         |
| P(BF-PBSS)-20 | 77            | 5.6                                  | 19             | 25              | 89               | 20.4                                    | 147           | 26.0                                 | 381                 | 414                 | 21.8         |
| P(BF-PBSS)-30 | /             | /                                    | 12             | 17              | 90               | 9.2                                     | 128           | 15.0                                 | 377                 | 419                 | 19.6         |
| P(BF-PBSS)-40 | /             | /                                    | 1              | 5               | 87               | 0.7                                     | 117           | 0.8                                  | 377                 | 421                 | 16.5         |
| P(BF-PBSS)-50 | /             | /                                    | -6             | -6              | /                | /                                       | /             | /                                    | 376                 | 425                 | 12.6         |

a  $T_g$  obtained by DMA results.

**Table S2** Relationship between cell relative growth rate (RGR) and cytotoxicity grade of a material.

|                    |            |       |       |       |      |   |
|--------------------|------------|-------|-------|-------|------|---|
| RGR (%)            | $\geq 100$ | 75-99 | 50-74 | 25-49 | 1-24 | 0 |
| Cytotoxicity grade | 0          | 1     | 2     | 3     | 4    | 5 |
